# Supplementary material for: Inactivation of Indigenous Microorganisms and Salmonella in Korean Rice Cakes by In-Package Cold Plasma Treatment
Source: PubMed Central journal article supplement (PMC8036629; doi:10.3390/ijerph18073360), 2021-03-24
Supplement: ijerph-18-03360-s001.pdf [file ijerph-18-03360-s001.pdf]

(Supplementary information)

Inactivation of indigenous microorganisms and *Salmonella* in Korean rice cakes by in-package cold plasma treatment

**Table S.1.** Effects of in-package cold plasma (CP) treatment on the color and firmness of rice cakes at various positions in the container

| Sample   | Color     |           |           |            |           |           | Firmness  |            |
|----------|-----------|-----------|-----------|------------|-----------|-----------|-----------|------------|
|          | Untreated |           |           | CP-treated |           |           | Untreated | CP-treated |
|          | <i>L*</i> | <i>a*</i> | <i>b*</i> | <i>L*</i>  | <i>a*</i> | <i>b*</i> |           |            |
| <b>1</b> | 74.5±1.8a | -1.6±0.1a | 7.4±1.7a  | 74.4±0.5a  | 1.5±0.1a  | 6.7±0.3a  | 41.5±4.6a | 43.4±6.5a  |
| <b>2</b> | 74.2±1.1a | -1.6±0.1a | 7.0±2.3a  | 73.6±1.0a  | -1.6±0.1a | 6.2±0.6a  | 44.4±5.5a | 45.5±4.5a  |
| <b>3</b> | 74.3±1.9a | -1.6±0.1a | 7.2± 1.4a | 73.1±1.8a  | -1.6±0.1a | 6.1±0.4a  | 42.1±5.9a | 45.7±4.8a  |
| <b>4</b> | 74.2±0.8a | -1.7±0.2a | 7.0±1.2a  | 73.0±1.0a  | -1.5±0.1a | 5.9±0.4a  | 44.6±3.9a | 43.4±8.3a  |
| <b>5</b> | 73.9±1.1a | -1.7±0.2a | 7.0±1.1a  | 73.2±1.6a  | -1.5±0.1a | 6.6±0.4a  | 42.3±2.2a | 42.7±0.7a  |
| <b>6</b> | 73.9±0.9a | -1.6±0.2a | 7.2±1.3a  | 73.1±0.9a  | -1.5±0.1a | 6.3±0.7a  | 42.4±2.5a | 43.6±2.5a  |
| <b>7</b> | 73.8±1.5a | -1.6±0.1a | 7.3±2.0a  | 73.3±1.1a  | -1.5±0.2a | 6.2±1.2a  | 43.0±2.7a | 44.5±3.0a  |
| <b>8</b> | 74.8±1.4a | -1.6±0.1a | 6.8±2.0a  | 74.3±0.9a  | -1.5±0.1a | 6.8±1.0a  | 43.0±2.2a | 45.2±6.0a  |

Results are expressed as means ± standard deviations ( $n = 6$ ). Different lowercase letters in the same column indicate a significant difference based on Tukey's test ( $P < 0.05$ ).

**Table S.2.** Effects of shaking during in-package cold plasma (CP) treatment on the color and firmness of rice cakes

| Treatments | Color       |            |            | Firmness  |           |
|------------|-------------|------------|------------|-----------|-----------|
|            | <i>L</i> *  | <i>a</i> * | <i>b</i> * |           |           |
| Untreated  | 74.7±0.8a   | -1.6±0.3a  | 7.3±0.4a   | 44.2±7.5a |           |
| CP-treated | Non-shaking | 74.5±0.9a  | -1.6±0.3a  | 7.3±0.4a  | 42.5±5.5a |
|            | Shaking     | 74.5±0.8a  | -1.6±0.2a  | 7.0±0.5a  | 42.8±6.2a |

Results are expressed as means ± standard deviations ( $n = 6$ ). Different same lowercase letters in the same column indicate a significant difference based on Tukey's test ( $P < 0.05$ ).

**Table S.3.** Effects of the in-package cold plasma (CP) treatment time on the color and firmness of rice cakes

| Treatment time<br>(min) | Color      |            |            | Firmness  |
|-------------------------|------------|------------|------------|-----------|
|                         | <i>L</i> * | <i>a</i> * | <i>b</i> * |           |
| 0                       | 74.7±0.8a  | -1.6±0.3a  | 7.2±0.4a   | 44.2±7.5a |
| 1                       | 74.7±1.2a  | -1.3±0.1a  | 7.1±0.3a   | 43.4±5.3a |
| 2                       | 74.9±1.4a  | -1.5±0.2a  | 6.7±0.5a   | 45.9±2.2a |
| 3                       | 74.5±0.8a  | -1.6±0.2a  | 7.0±0.5a   | 42.8±6.2a |
| 4                       | 74.1±1.4a  | -1.5±0.2a  | 6.8±0.3a   | 43.9±6.6a |
| 5                       | 74.0±1.0a  | -1.6±0.2a  | 6.8±0.5a   | 42.2±5.1a |

Results are expressed as means ± standard deviations ( $n = 6$ ). Different same lowercase letters in the same column indicate a significant difference based on Tukey's test ( $P < 0.05$ ).

**Table S.4.** Effects of the number of Korean rice cake (KRC) in the container on the color and firmness of KRC after in-package cold plasma treatment

| Treatment / number<br>of KRC | Color      |            |            | Firmness  |
|------------------------------|------------|------------|------------|-----------|
|                              | <i>L</i> * | <i>a</i> * | <i>b</i> * |           |
| <b>Untreated</b>             | 74.7±0.8a  | -1.6±0.3a  | 7.2±0.4a   | 44.2±7.5a |
| <b>4</b>                     | 73.9±1.0a  | -1.7±0.1a  | 6.9±0.3a   | 41.8±3.9a |
| <b>CP-treated 8</b>          | 74.5±0.8a  | -1.6±0.2a  | 7.0±0.5a   | 42.8±6.2a |
| <b>12</b>                    | 74.0±1.1a  | -1.4±0.1a  | 6.9±0.7a   | 42.2±4.8a |

Results are expressed as means ± standard deviations ( $n = 6$ ). Different same lowercase letters in the same column indicate a significant difference based on Tukey's test ( $P < 0.05$ ).
